# Supplementary material for: Interspecies Differences in Proteome Turnover Kinetics Are Correlated With Life Spans and Energetic Demands
Source: PubMed Central journal article supplement (PMC7950207; doi:10.1074/mcp.ra120.002301), 2021-01-07
Supplement: mmc3.pdf [file mmc3.pdf]

## ASSOCIATED CONTENT

Spectral search results and quantitations, dynamic SILAC rate measurements, TLS measurements and gene ontology analyses are provided in tabular format in the supplementary tables.

### Supplemental Figures

Figure S1. Summary of experiments

Figure S2. Peptide-level comparisons of fractional labeling in dynamic SILAC experiments

Figure S3. Cross-species correlations of protein  $k_{deg}$  measurements decrease with increasing evolutionary divergence time.

Figure S4. Distribution of  $k_{deg}$  measurements and their correlations with lifespan for the subset of peptides shared among all species

Figure S5. Correlation of  $k_{deg}$  measurements with body mass

Figure S6. Cross-species differences in  $k_{deg}$  are correlated with protein abundance

Figure S7. GO term enrichment analysis of protein level differences in mouse and naked mole rat cells

Figure S8.  $^{13}\text{C}$  proline and AZC incorporation in mouse and naked mole rat cells

Figure S9. Ubiquitination in response to AZC in mouse and naked mole rat cells

### Supplemental Tables

Table S1. Coverage of dynamic SILAC experiments (this document)

Table S2. Dynamic SILAC LC/MS/MS data (TableS2.xlsx)

Table S3.  $k_{degradation}$  measurements (TableS3.xlsx)

Table S4. Turnover-lifespan slope (TLS) measurements (TableS4.xlsx)

Table S5. Turnover-lifespan slope (TLS) GO enrichment (TableS5.xlsx)

Table S6. iBAQ abundance data (TableS6.xlsx)

Table S7. Mouse vs. naked mole rat LC-MS/MS label free quantitation (LFQ) data (TableS7.xlsx)

Table S8. Mouse vs. naked mole rat LC-MS/MS label free quantitation (LFQ) GO enrichment (TableS8.xlsx)

Table S9. AZC incorporation LC-MS/MS data (TableS9.xlsx)

(Note: Tables S2-S9 are available as individual Excel files with additional descriptions contained within each file)

### Accession Numbers

All raw and processed data are available at ProteomeXchange Consortium via the PRIDE database (accession number: PXD018325)

## **Supplementary Figures**

| Analyzed Species                                                                                                                              | Method                                  | Measured parameter               |
|-----------------------------------------------------------------------------------------------------------------------------------------------|-----------------------------------------|----------------------------------|
| Mouse, Rat, Hamster,<br>Blind Mole Rat, Beaver,<br>Chinchilla, Guinea Pig,<br>Naked Mole Rat, Human,<br>Bowhead Whale,<br>Humpback Whale, Cow | Dynamic SILAC                           | Protein turnover rates           |
|                                                                                                                                               | Label-free quantitation and iBAQ        | Protein levels                   |
|                                                                                                                                               | Seahorse assay                          | ATP production rates             |
| Mouse vs. Naked Mole Rat                                                                                                                      | ROS-specific dyes & flow cytometry      | Intracellular ROS levels         |
|                                                                                                                                               | Viability in presence of AZC            | Tolerance of proteotoxic stress  |
|                                                                                                                                               | Accumulation of AZC-containing proteins | Accumulation of damaged proteins |

**Figure S1**

**Figure S1. Summary of experiments.** The table lists the methods and corresponding measured parameters in cross-species experiments reported in the manuscript. Blue listings correspond to proteome-wide analyses and black listings correspond to low throughput biochemical and cell-based studies.

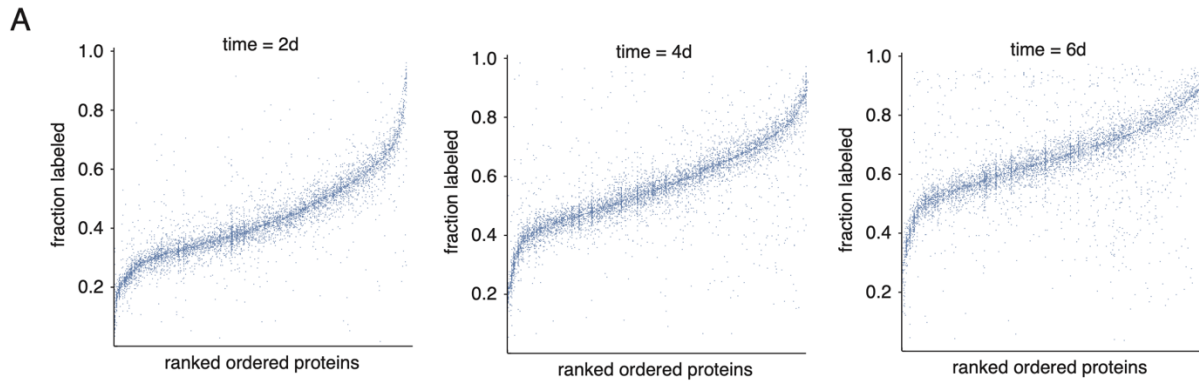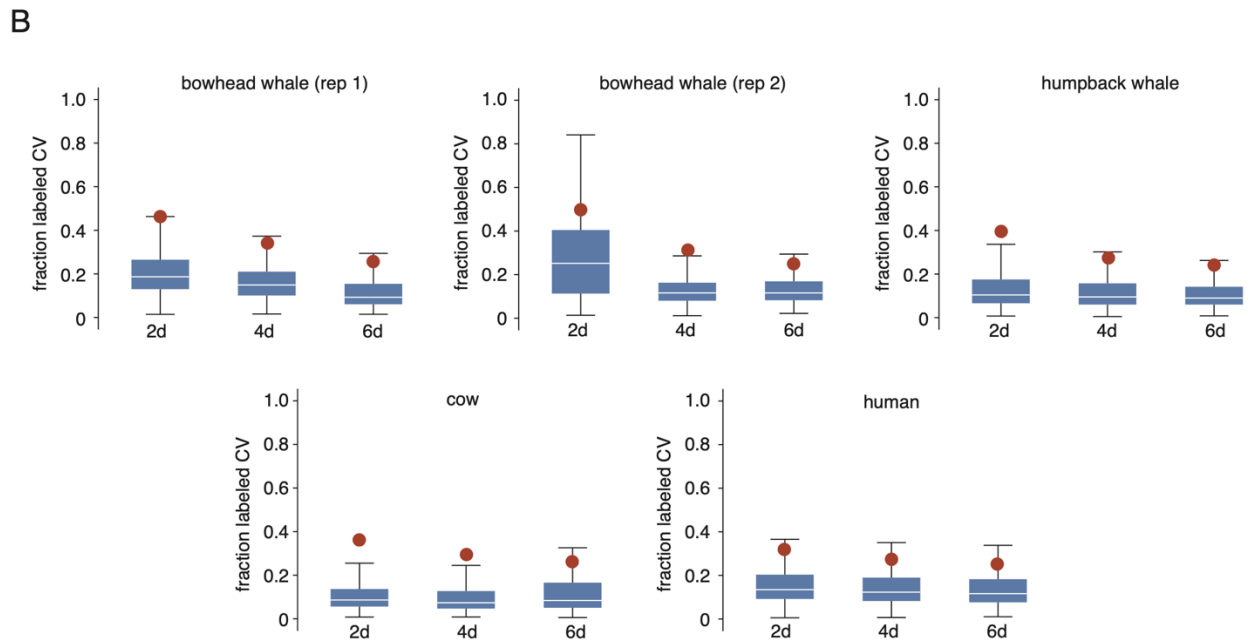

**Figure S2**

**Figure S2. Peptide-level comparisons of fractional labeling in dynamic SILAC experiments.** A. Rank-distribution plots showing the fractional labeling of peptides matched to each protein within the proteome at different time-points. Vertical columns of blue points on the plot represent data for peptides matched to specific proteins. The plots generated for human data are shown as an example. Note that the range of measured fractional labeling for peptides within each protein is significantly narrower than the entire range of all measured peptides within the proteome. Plots from other species show similar trends. B. Box plots indicate the range of coefficient of variations (CVs) for measured fractional labeling of peptides mapped to the same protein. The dots indicate the CV for all peptides at a given time-point. Note that the intra-protein CV of peptide fractional labeling measurements are generally lower than the fractional labeling CV of all peptides in a dataset. Similar analyses for rodent species are presented in Swovick et al (1).

**A**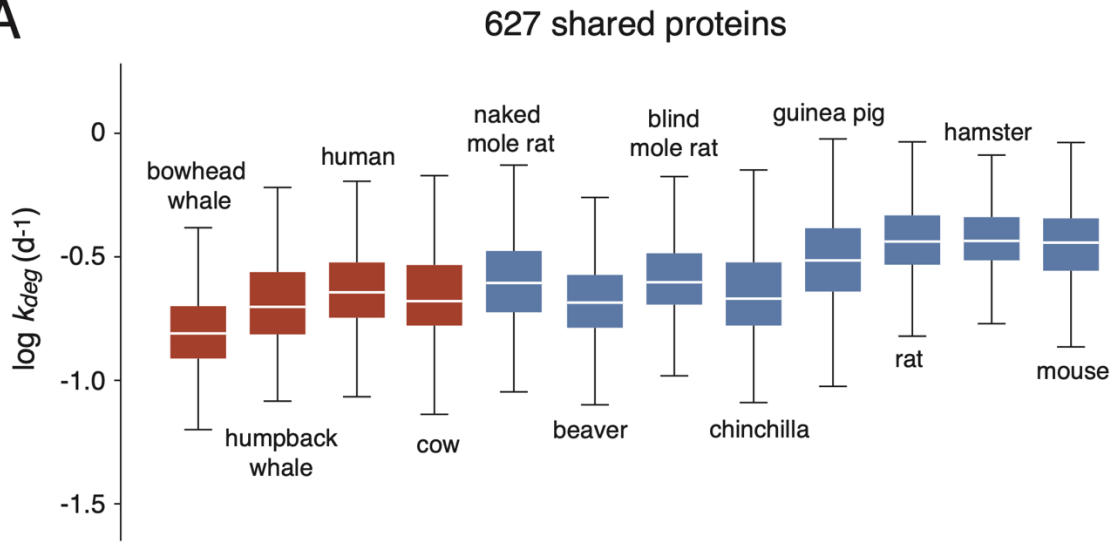**B**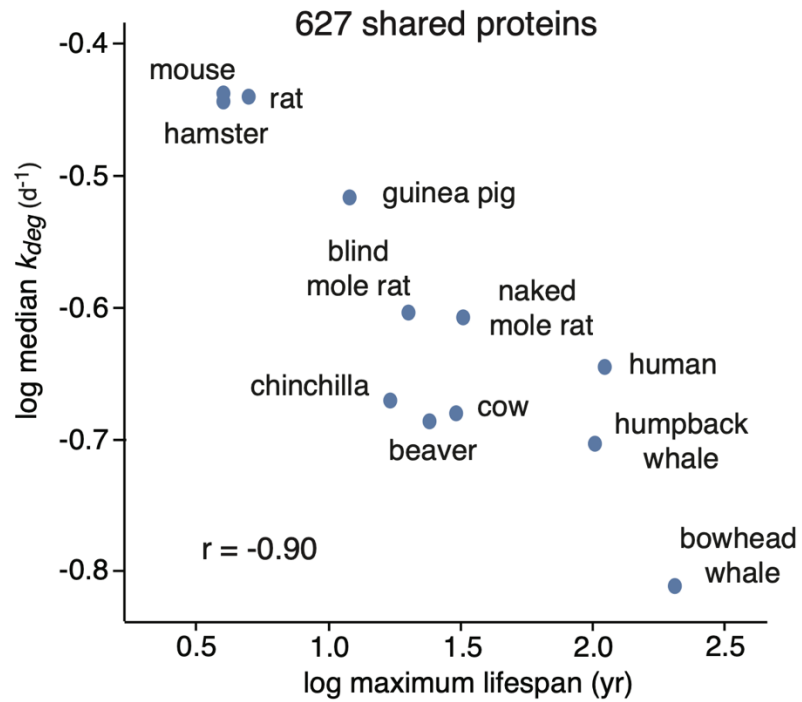**Figure S3**



**Figure S3. Distribution of  $k_{deg}$  measurements and their correlations with lifespan for the subset of peptides shared among all species.** A. Distribution of  $k_{deg}$  values for shared 627 orthologous proteins quantified in all species. Red boxes indicate newly generated data while blue boxes indicate data generated by Swovick et al (1). B. Correlation of median  $k_{deg}$  values with maximal lifespans for shared 627 orthologous proteins quantified in all species. C. Correlation of median  $k_{deg}$  values with adult body mass for all measured proteins (left) and 627 orthologous proteins quantified in all species (right).

A

|                |                |                |                |                |                |              |              |              |              |              |              |  |  |  |  |  |  |  |  |  |  |  |  |
|----------------|----------------|----------------|----------------|----------------|----------------|--------------|--------------|--------------|--------------|--------------|--------------|--|--|--|--|--|--|--|--|--|--|--|--|
|                |                | bowhead whale  |                |                |                |              |              |              |              |              |              |  |  |  |  |  |  |  |  |  |  |  |  |
| cow            | 55<br>(0.85)   | cow            |                |                |                |              |              |              |              |              |              |  |  |  |  |  |  |  |  |  |  |  |  |
| humpback whale | 27<br>(0.79)   | 55<br>(0.71)   | humpback whale |                |                |              |              |              |              |              |              |  |  |  |  |  |  |  |  |  |  |  |  |
| blind mole rat | 87.5<br>(0.81) | 87.5<br>(0.79) | 87.5<br>(0.74) | blind mole rat |                |              |              |              |              |              |              |  |  |  |  |  |  |  |  |  |  |  |  |
| naked mole rat | 87.5<br>(0.79) | 87.5<br>(0.79) | 87.5<br>(0.69) | 80<br>(0.79)   | naked mole rat |              |              |              |              |              |              |  |  |  |  |  |  |  |  |  |  |  |  |
| beaver         | 87.5<br>(0.73) | 87.5<br>(0.73) | 87.5<br>(0.71) | 66<br>(0.73)   | 70<br>(0.8)    | beaver       |              |              |              |              |              |  |  |  |  |  |  |  |  |  |  |  |  |
| hamster        | 87.5<br>(0.8)  | 87.5<br>(0.83) | 87.5<br>(0.67) | 45<br>(0.84)   | 70<br>(0.82)   | 66<br>(0.77) | hamster      |              |              |              |              |  |  |  |  |  |  |  |  |  |  |  |  |
| chinchilla     | 87.5<br>(0.79) | 87.5<br>(0.8)  | 87.5<br>(0.72) | 70<br>(0.78)   | 48<br>(0.81)   | 70<br>(0.76) | 70<br>(0.78) | chinchilla   |              |              |              |  |  |  |  |  |  |  |  |  |  |  |  |
| guinea pig     | 87.5<br>(0.78) | 87.5<br>(0.79) | 87.5<br>(0.62) | 70<br>(0.76)   | 48<br>(0.85)   | 70<br>(0.74) | 70<br>(0.82) | 43<br>(0.81) | guinea pig   |              |              |  |  |  |  |  |  |  |  |  |  |  |  |
| mouse          | 87.5<br>(0.75) | 87.5<br>(0.76) | 87.5<br>(0.65) | 45<br>(0.81)   | 70<br>(0.8)    | 66<br>(0.74) | 26<br>(0.85) | 70<br>(0.73) | 70<br>(0.8)  | mouse        |              |  |  |  |  |  |  |  |  |  |  |  |  |
| rat            | 87.5<br>(0.8)  | 87.5<br>(0.79) | 87.5<br>(0.64) | 45<br>(0.85)   | 70<br>(0.81)   | 66<br>(0.71) | 26<br>(0.87) | 70<br>(0.75) | 70<br>(0.81) | 18<br>(0.85) | rat          |  |  |  |  |  |  |  |  |  |  |  |  |
| human          | 87.5<br>(0.82) | 87.5<br>(0.79) | 87.5<br>(0.83) | 80<br>(0.85)   | 80<br>(0.76)   | 80<br>(0.73) | 80<br>(0.78) | 80<br>(0.75) | 80<br>(0.72) | 80<br>(0.77) | 80<br>(0.78) |  |  |  |  |  |  |  |  |  |  |  |  |

B

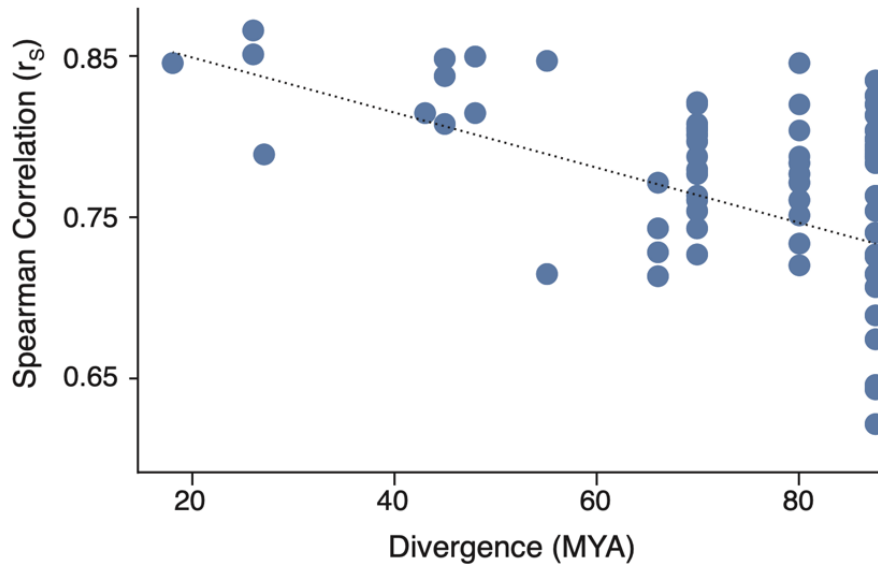

Figure S4

**Figure S4. Cross-species correlations of protein  $k_{deg}$  measurements decrease with increasing evolutionary divergence times.** A. Divergence times in millions of years (top number) and spearman rank correlation coefficients of  $k_{deg}$  values (bottom number) for pairs of species. B. Comparison of spearman rank correlation coefficients and divergence times for pairs of species. Dotted line represents the line of best fit.

A

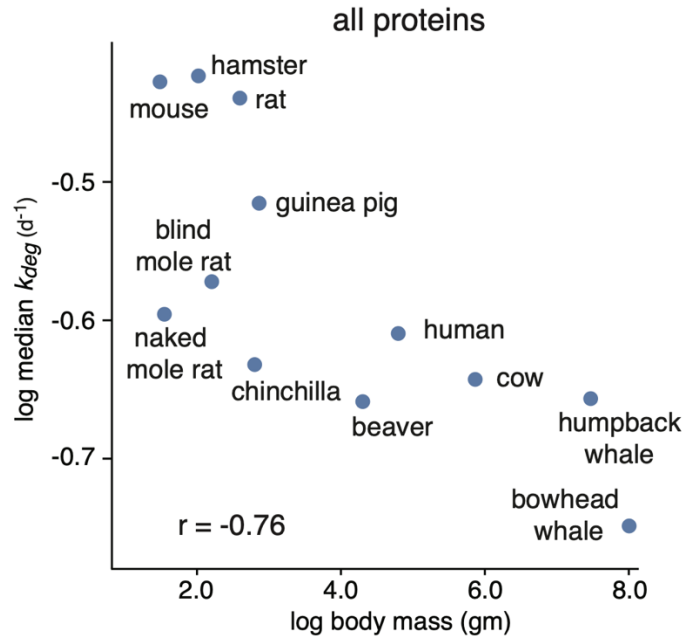

B

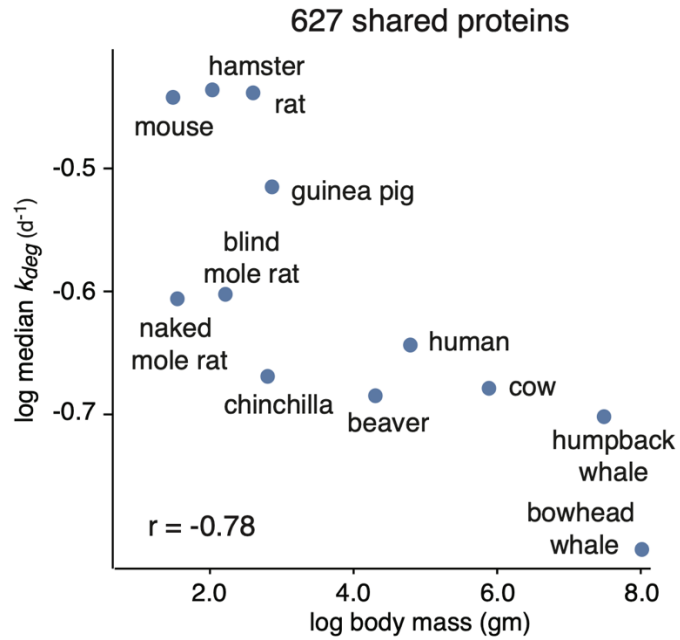

Figure S5

**Figure S5. Correlation of  $k_{deg}$  measurements with body mass.** Correlation of median  $k_{deg}$  values with adult body mass for all measured proteins (A) and 627 orthologous proteins quantified in all species (B).

**A**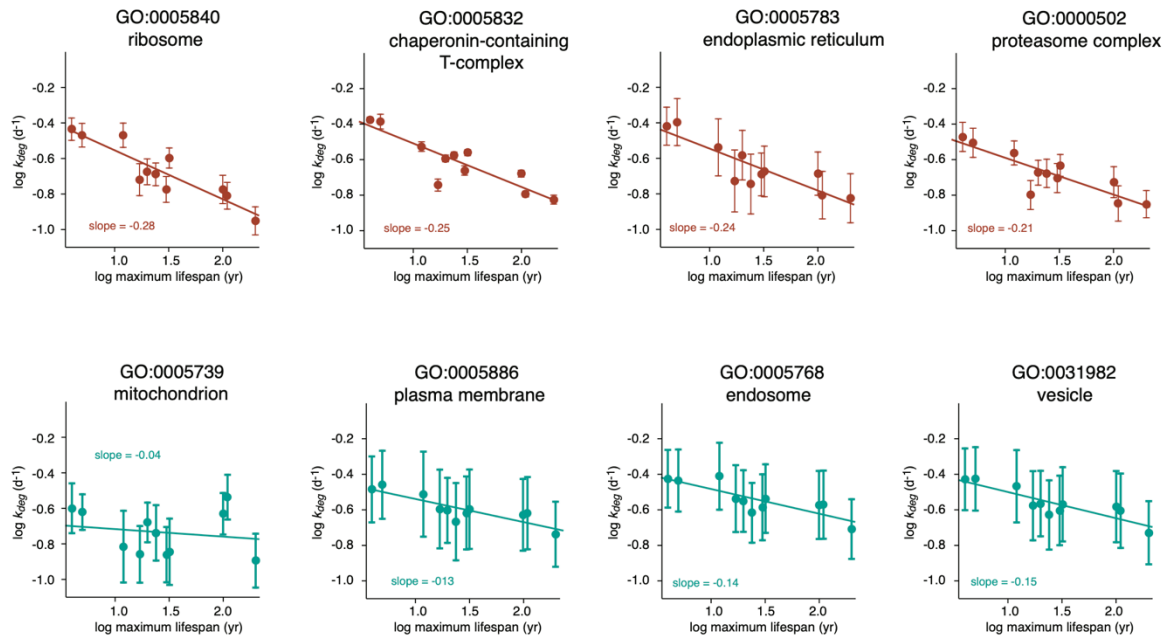**B**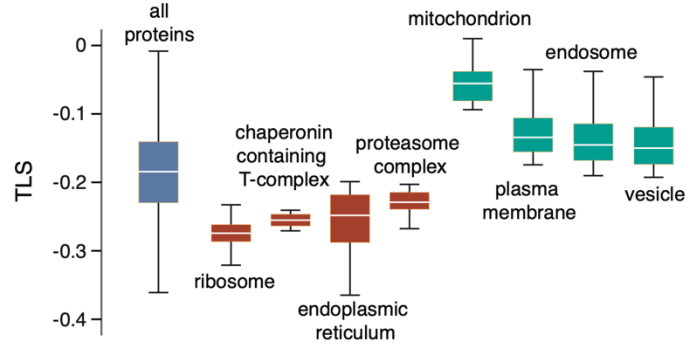**C**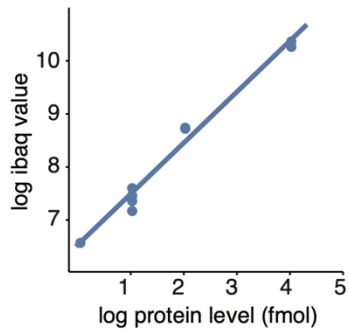**D**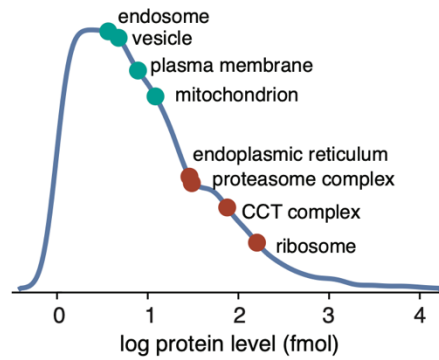**Figure S6**

**Figure S6. Cross-species differences in  $k_{deg}$  are correlated with protein abundance**

A.  $k_{deg}$  of proteins mapped to specific GO terms in different species as a function of maximum lifespan. Red and cyan plots highlight GO terms that have steep and shallow slopes (TLS values), respectively. Error bars represent standard deviation of  $k_{deg}$  measurements and lines represent lines of best fit. B. Distribution of TLS values for GO terms shown in A. Box plot representations are as described in Figure 1. C. iBAQ protein abundance calculations in mouse cells. (Left) Standard curve from spiked-in UPS2 standards in iBAQ experiment. (Right) Distribution of absolute protein levels in mouse cells. Indicated are the median abundances for GO terms listed in A and B.

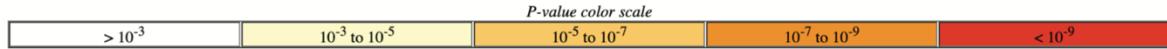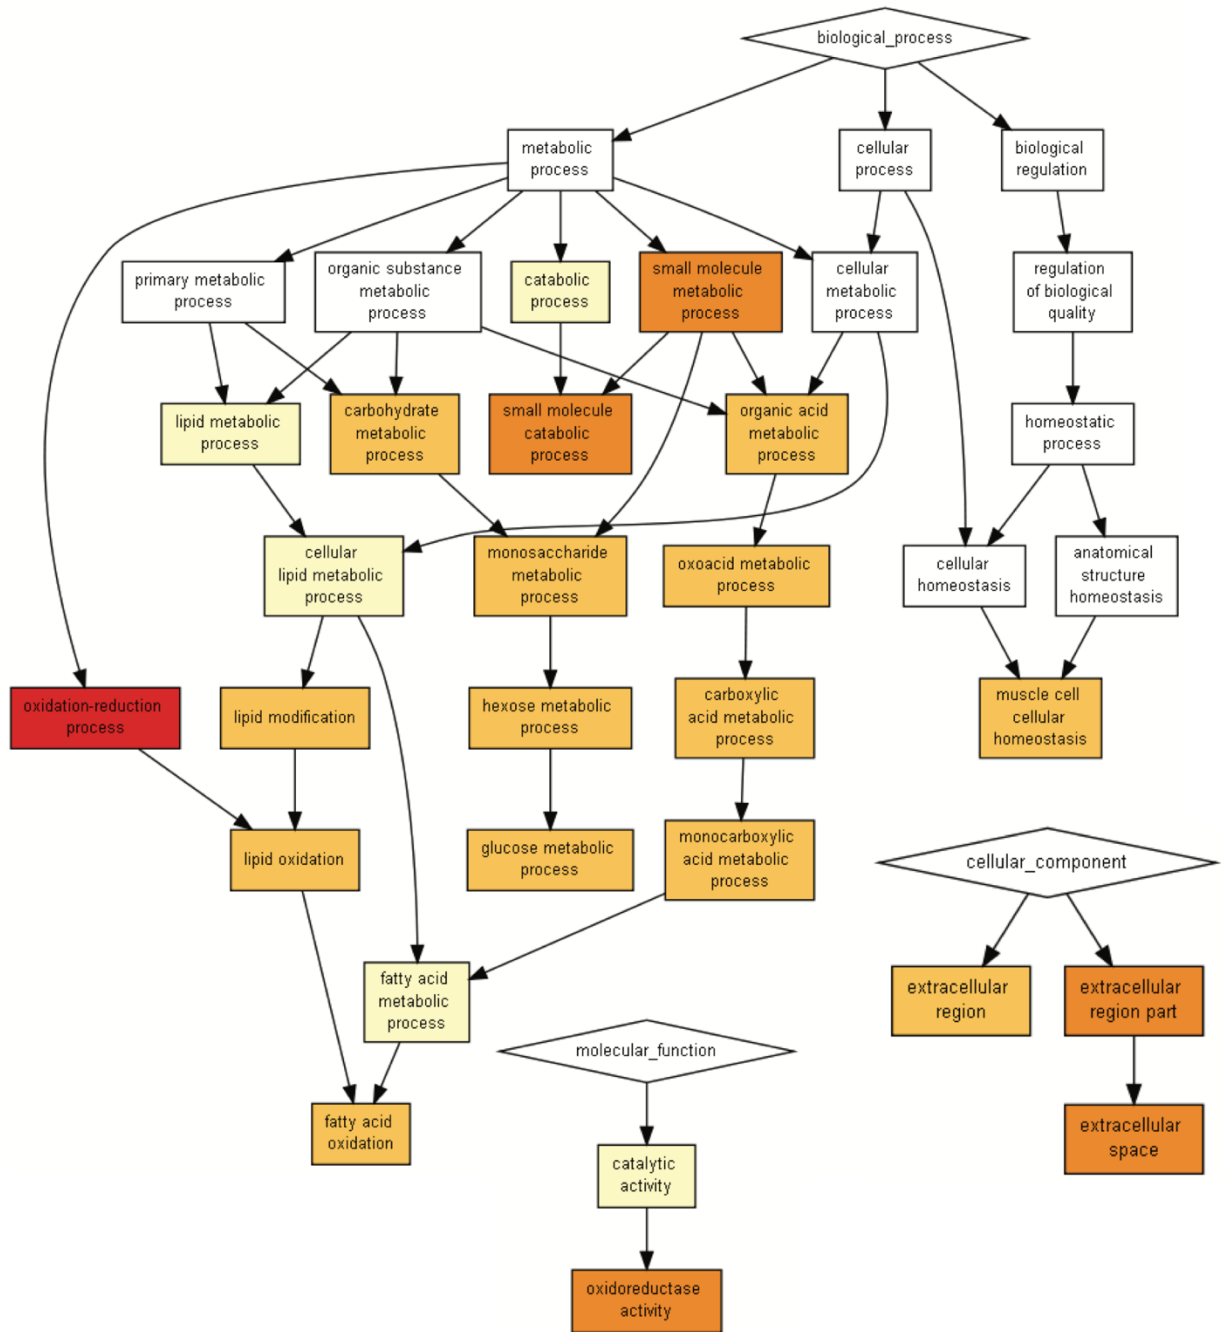

**Figure S7**



**Figure S7. GO term enrichment analysis of protein level differences in mouse and naked mole rat cells.** Network map of GO terms enriched within proteins that have higher expression levels in naked mole rat cells compared to mouse cells. The color scaling indicates p-values of the enrichment. The figure was generated using GOrilla (2).

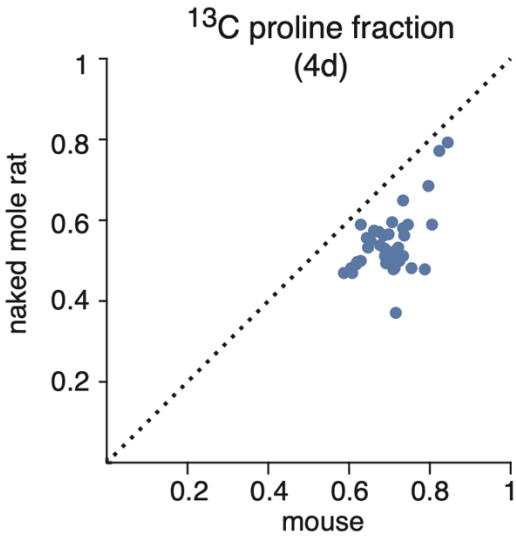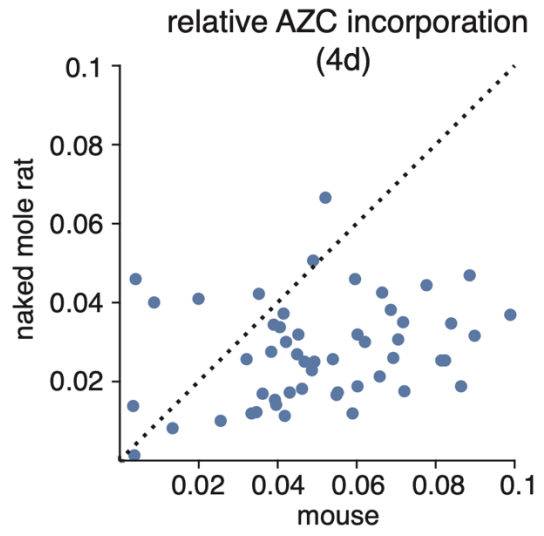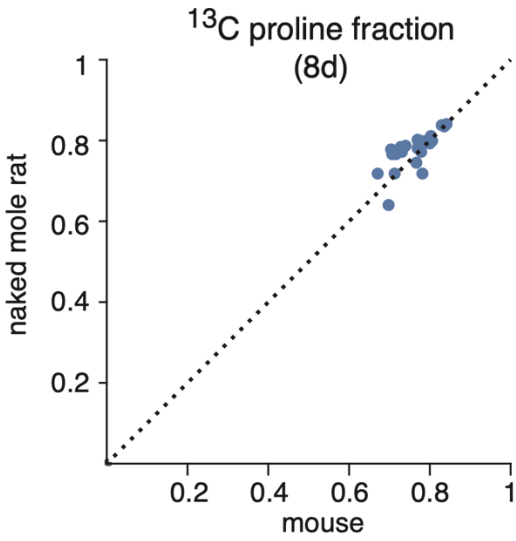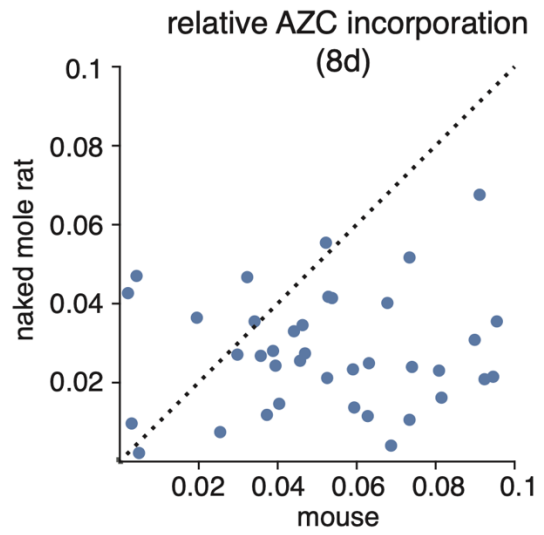

Figure S8

**Figure S8.  $^{13}\text{C}$  proline and AZC incorporation in mouse and naked mole rat cells.**

Pairwise comparisons of  $^{13}\text{C}$  proline (left) and AZC (right) incorporation for peptides quantified in both mouse and naked mole rat cells. Each point indicates a unique peptide quantified in both species on the specified day. Dotted line indicates the line of identity.

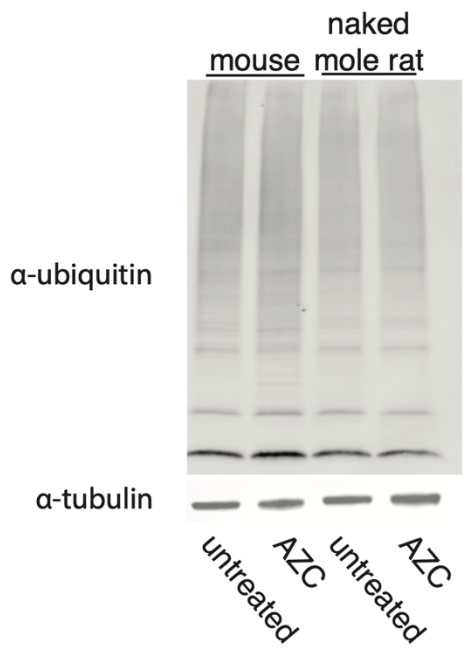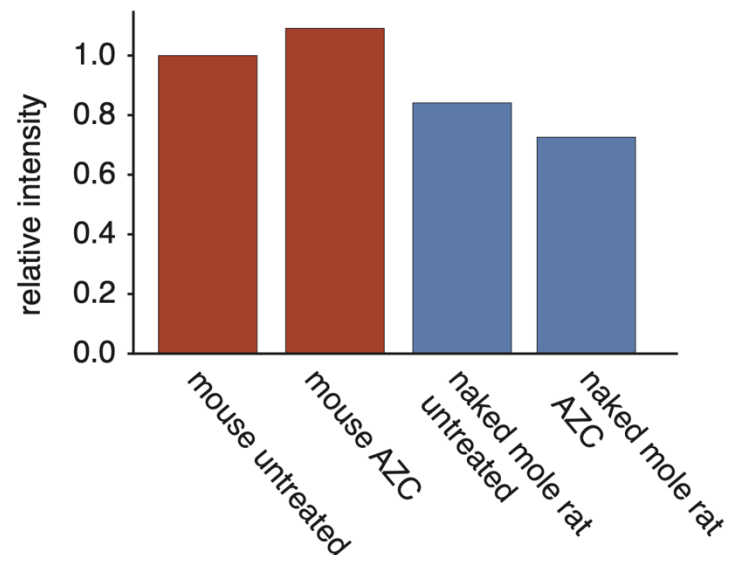

Figure S9

**Figure S9. Ubiquitination in response to AZC in mouse and naked mole rat cells.**

Cells were treated with AZC and extracts were collected after 4 days and analyzed via western blot using an anti-ubiquitin antibody. An anti-tubulin was used as a loading control. Right indicates the quantification of the western blot. Band intensities were normalized to untreated mouse cells.

## **Supplementary Tables**

| Experiment          | Time-point | Detected         |                | H/L quantified   |                | $k_{deg}$ measured |                |
|---------------------|------------|------------------|----------------|------------------|----------------|--------------------|----------------|
|                     |            | Unique peptides  | Protein groups | Unique peptides  | Protein groups | Unique peptides    | Protein groups |
| Human               | 2d         | 25881<br>(12370) | 4766<br>(3116) | 18523<br>(9585)  | 2951<br>(1780) |                    |                |
|                     | 4d         | 29539<br>(14008) | 5031<br>(3275) | 21149<br>(9934)  | 2934<br>(1745) | 16091<br>(8018)    | 2671<br>(1586) |
|                     | 6d         | 26394<br>(13418) | 4829<br>(3219) | 17458<br>(8889)  | 2657<br>(1601) |                    |                |
| Cow                 | 2d         | 34025<br>(16372) | 4581<br>(3083) | 26322<br>(13019) | 3224<br>(2002) |                    |                |
|                     | 4d         | 30458<br>(15243) | 4240<br>(2861) | 23136<br>(11656) | 2798<br>(1803) | 16978<br>(8578)    | 2688<br>(1737) |
|                     | 6d         | 28758<br>(14387) | 4033<br>(2784) | 21605<br>(11042) | 2660<br>(1727) |                    |                |
| Humpback Whale      | 2d         | 20932<br>(16245) | 3459<br>(3125) | 16014<br>(12559) | 2302<br>(1949) |                    |                |
|                     | 4d         | 16932<br>(15165) | 3319<br>(2888) | 14735<br>(11438) | 2079<br>(1781) | 7926<br>(6181)     | 1938<br>(1652) |
|                     | 6d         | 18584<br>(14507) | 3219<br>(2769) | 13687<br>(10722) | 1946<br>(1663) |                    |                |
| Bowhead Whale rep 1 | 2d         | 18136<br>(14027) | 3489<br>(2885) | 13733<br>(10686) | 2218<br>(1818) |                    |                |
|                     | 4d         | 18324<br>(13882) | 3421<br>(2912) | 14022<br>(10675) | 2150<br>(1779) | 10194<br>(7795)    | 1756<br>(1547) |
|                     | 6d         | 16781<br>(12877) | 3141<br>(2641) | 12734<br>(9775)  | 2011<br>(1665) |                    |                |
| Bowhead Whale rep 2 | 2d         | 20237<br>(15371) | 3548<br>(3012) | 15532<br>(11898) | 2349<br>(1954) |                    |                |
|                     | 4d         | 18628<br>(14347) | 3338<br>(1796) | 14426<br>(11070) | 2157<br>(1794) | 9866<br>(7675)     | 1742<br>(1608) |
|                     | 6d         | 16336<br>(12744) | 3154<br>(2755) | 12281<br>(9668)  | 1981<br>(1642) |                    |                |

**Table S1. Coverage of dynamic SILAC experiments.** “Unique peptides” indicates the number of unique peptide sequences. “Protein groups” indicates the number of homologous protein groups. The reported number of quantified protein groups is limited to those for which heavy to light ratios (H/L) could be quantified by two independent spectra. The number of reported  $k_{deg}$  values measured for protein groups is limited to those where two distinct peptides could be measured in two or more time-points and the least squares fit to a first-order equation had an  $R^2 > 0.80$ . Numbers not in parentheses correspond to searches against species-specific sequence databases, or the most closely related sequence database available. Numbers in parentheses correspond to searches conducted against the *M. musculus* sequence database. All subsequent analyses were conducted using the *M. musculus* searches in order to compare an overlapping set of peptides shared between all species. However, the results from the species-specific searches are available on the PRIDE database (accession number PXD018325).



## **References**

1. Swovick K, Welle KA, Hryhorenko J, Seluanov A, Gorbunova V, Ghaemmaghami S. Cross-species comparison of proteome turnover kinetics. *Molecular & Cellular Proteomics*. 2018:mcp.RA117.000574.
2. Eden E, Navon R, Steinfeld I, Lipson D, Yakhini Z. GOrilla: a tool for discovery and visualization of enriched GO terms in ranked gene lists. *BMC Bioinformatics*. 2009;10:48.
